# Supplementary material for: Yeast eIF4A enhances recruitment of mRNAs regardless of their structural complexity
Source: eLife. 2017 Nov 30;6:e31476. doi: 10.7554/eLife.31476 (PMC5726853; doi:10.7554/eLife.31476)
Supplement: Figure 1—source data 1. [file elife-31476-fig1-data1.xlsx]

## Sheet: Sheet1
Figure 1 - Source Data 1
Figure 1A				Figure 1B
ATP				ATP
Time (min)	Replicate 1	Replicate 2		Time (min)	Replicate 1	Replicate 2
0.25	12.8	11.67		0.333	62.5	73.27
0.5	27.43	22.57		0.667	77.02	81.78
2	71.07	78.64		1	82.87	83.8
10	89.23	90.83		7	85.33	91.83
45	91.38	94.23		20	92.04	91.87
120	90.89	92.36		60	86.79	91.64
				120	93.17	92.64
				180	90.64	92.45
kobs (min-1)	0.732	0.739		kobs (min-1)	3.3664	4.5289
endpoint (%)	90.7	93.3		endpoint (%)	88.92	90.539
No Nucleotide				No Nucleotide
Time (min)	Replicate 1	Replicate 2		Time (min)	Replicate 1	Replicate 2
2	5.42	4.72		0.333	28.2	29.83
5	4.98	4.04		0.67	37.53	40.5
15	3.4	3.63		1	48.44	48.07
30	4.36	5.52		7	75.87	78.19
60	5.33	5.24		20	85.3	86.87
120	5.77	7.7		60	86.41	89.3
360	6.48	9.48		120	92.9	92.73
				180	91.48	90.12
kobs (min-1)	ND	ND		kobs (min-1)	0.88752	0.91621
endpoint (%)	<10	<10		endpoint (%)	86.369	87.353
ATP-Ɣ-S				ATP-Ɣ-S
Time (min)	Replicate 1	Replicate 2		Time (min)	Replicate 1	Replicate 2
2	8	7.07		0.333	46.55	49.92
5	12.12	12.59		0.67	63.47	73.81
15	18.59	20.25		1	74.11	80.12
30	34.52	39.14		7	81.28	87.32
60	49.45	49.87		20	87.97	90.3
120	64.58	69.93		60	87.52	86.7
360	77.06	80.52		120	89.19	92.98
				180	91.2	88.37
kobs (min-1)	0.01908	0.0197		kobs (min-1)	2.0651	2.4983
endpoint (%)	74.97	78.64		endpoint (%)	87.15	89.038
ADPCP				ADPCP
Time (min)	Replicate 1	Replicate 2		Time (min)	Replicate 1	Replicate 2
2	3.99	2.94		0.333	33.1	34.67
5	4.15	3.14		0.67	43.22	42.2
15	3.37	3.51		1	50.9	49.53
30	4.74	5.35		7	73.64	74.9
60	4.89	6.15		20	81.15	84.79
120	6.34	5.85		60	86.25	84.49
360	9.81	9.09		120	90.38	91.19
				180	89.51	86.08
kobs (min-1)	ND	ND		kobs (min-1)	1.0912	1.068
endpoint (%)	<15	<15		endpoint (%)	83.983	84.053
ADPNP				ADPNP
Time (min)	Replicate 1	Replicate 2		Time (min)	Replicate 1	Replicate 2
2	3.52	4.55		0.333	39.17	36.89
5	4.5	5.04		0.67	49.37	48.85
15	5.04	5.89		1	59.94	60.97
30	8.12	8.78		7	77.47	82.28
60	9.79	10.32		20	86.56	87.62
120	11.99	12.52		60	87.56	85.75
360	15.36	16.18		120	90.52	90.98
				180	89.33	87.91
kobs (min-1)	ND	ND		kobs (min-1)	1.3686	1.3226
endpoint (%)	<20	<20		endpoint (%)	85.981	86.703
ADP				ADP
Time (min)	Replicate 1	Replicate 2		Time (min)	Replicate 1	Replicate 2
2	2.59	3.01		0.333	27.07	20.7
5	3.39	5.08		0.67	41.44	31.45
15	3.44	4.21		1	46.49	41.85
30	5.22	7.73		7	77.92	71.95
60	5.19	8.22		20	76.96	77.69
120	8.43	13.53		60	83.96	78.38
360	20.18	13.24		120	89.47	86.08
				180	86.18	85.34
kobs (min-1)	ND	ND		kobs (min-1)	0.96282	0.75795
endpoint (%)	<20	<20		endpoint (%)	82.788	80
No eIF4A				No eIF4A
Time (min)	Replicate 1	Replicate 2		Time (min)	Replicate 1	Replicate 2
2	1.93	0.46		0.333	18.44	22.13
5	1.73	1.79		0.67	32.33	34.4
10	2.52	1.01		1	39.02	43.85
30	3.18	4.24		7	74.54	69.67
60	3.91	4.21		20	72.45	74.54
120	5.69	5.71		75	81.64	75.99
kobs (min-1)	ND	ND		kobs (min-1)	0.76985	0.95043
endpoint (%)	<10	<10		endpoint (%)	76.285	73.371
