# Supplementary material for: Yeast eIF4A enhances recruitment of mRNAs regardless of their structural complexity
Source: eLife. 2017 Nov 30;6:e31476. doi: 10.7554/eLife.31476 (PMC5726853; doi:10.7554/eLife.31476)
Supplement: Figure 2—source data 1. [file elife-31476-fig2-data1.xlsx]

## Sheet: Sheet1
Figure 2 - Source Data 1
Figure 2A
	4A alone
[mRNA], nM	Replicate 1, min-1	Replicate 2, min-1
1000	0.4922	0.44072
500	0.48878	0.40764
250	0.4348	0.38404
100	0.39448	0.34988
50	0.36244	0.30432
0	0.27008	0.2016
kcat (min-1)	0.516	0.446
Km for RNA (nM)	96.9	71.7
Figure 2B
	Complete PIC		"Complete PIC"-40S		4A•4G•4E (no PIC)
[mRNA], nM	Replicate 1, min-1	Replicate 2, min-1	Replicate 1, min-1	Replicate 2, min-1	Replicate 1, min-1	Replicate 2, min-1
1000	7.53	8.8094	4.361	4.71545	2.457	2.852
500	7.457	8.7362	3.8	4.44488	2.13	2.6032
250	6.9968	7.9592	3.1772	3.76829	1.73984	2.244
100	6.0032	7.006	2.3674	3.04683	1.4943	1.95284
50	5.53	6.4938	2.0634	2.72618	0.83366	0.9839
0	5.3236	6.4262	1.53414	1.97382	0.21448	0.29448
kcat (min-1)	8.2586	9.8304	5.298	5.306	2.654	3.096
Km for RNA (nM)	225	302	331	202	122	97.8
Figure 2C
	4A•4G•4E			TC, 40S, 4A•4G•4E		3, 4A•4G•4E		Complete PIC				–4A		–40S		–2		–3		–3g, –3i		–2, –40S		–3, –40S		–4B		–5
[ATP], µM	Replicate 1, min-1	Replicate 2, min-1	Replicate 3, min-1	Replicate 1, min-1	Replicate 2, min-1	Replicate 1, min-1	Replicate 2, min-1	Replicate 1, min-1	Replicate 2, min-1	Replicate 3, min-1	Replicate 4, min-1	Replicate 1, min-1	Replicate 2, min-1	Replicate 1, min-1	Replicate 2, min-1	Replicate 1, min-1	Replicate 2, min-1	Replicate 1, min-1	Replicate 2, min-1	Replicate 1, min-1	Replicate 2, min-1	Replicate 1, min-1	Replicate 2, min-1	Replicate 1, min-1	Replicate 2, min-1	Replicate 1, min-1	Replicate 2, min-1	Replicate 1, min-1	Replicate 2, min-1
5000	2.22028	2.46714	2.35814	2.92985	2.3652	3.83701	2.5	7.45153	7.87154	7.34652	8.09579	0.0825854	0.136537	4.56748	4.3665	4.7285	4.65657	3.49919	3.19792	3.64	4.292	4.1862	3.9156	3.0838	3.084	7.19854	7.25632	7.18376	7.81285
2000	1.90646	2.17283		2.47294	2.0926	3.35896	2.4106	6.67917	7.40488	6.91563		0.0442764	0.113122	4.20813	4.14537	4.2098	4.14112	3.0748		3.258	3.96	3.9724	3.672	2.6756	2.7618	6.69447		6.53823	7.21447
500	1.41605	1.49641	1.42375	1.86969	1.34386	2.42888	1.87444	4.4434	4.93333	4.4701	4.88148	0.0312683	0.105415	3.31545	3.22179	3.1155	3.11185	2.33171	2.13077	2.448	3.008	3.0058	2.88	2.136	2.1314	3.92537	3.89079	4.2927	4.68602
200	1.01849	1.11852		1.33002	1.00474	1.75408	1.38604	3.01738	3.4374	2.8953		-1.62602e-05	0.0913984	2.52033	2.44618	2.31387	2.22405	1.69593		1.852	2.326	2.4844	2.1782	1.66378	1.67186	2.30423		2.87807	2.96081
50	0.57052	0.552016	0.513836	0.624976	0.49588	0.778309	0.62858	1.3382	1.39577	1.22197	1.38696	0.0205366	0.0842764	1.36488	1.30488	1.22054	1.17299	0.979024	0.913481	1.078	1.366	1.21306	1.23508	0.93934	0.97892	0.900163	0.944223	1.30229	1.26846
0	0	0	0	0	0	0	0	0	0	0	0	0	0	0	0	0	0	0	0	0	0	0	0	0	0	0	0	0	0
100			0.780112								2.16945								1.27893								1.50037
kcat (min-1)	2.2058	2.5074	2.3994	2.924	2.448	3.9	2.586	7.8364	8.3668	7.9362	8.5192	0.12122	0.11906	4.5612	4.422	4.7372	4.6858	3.4694	3.1546	3.6028	4.2618	4.2146	3.926	2.9854	3.0164	8.0568	7.9024	7.6138	8.4198
Km for ATP (µM)	228.69	266.63	250.69	248	319.63	260	172	335.23	302.45	351.42	326.15	ND	ND	153.12	152.8	208.88	215.14	197.48	159.25	179.27	154.28	146.4	146.7	151.67	151.06	492.29	476.7	340.19	368.55
Figure 2D
	4A alone		Complete PIC –4G•4E		–40S, –4G•4E		–2, –4G•4E		–3, –4G•4E		–3g, –3i, –4G•4E
[ATP], µM	Replicate 1, min-1	Replicate 2, min-1	Replicate 1, min-1	Replicate 2, min-1	Replicate 1, min-1	Replicate 2, min-1	Replicate 1, min-1	Replicate 2, min-1	Replicate 1, min-1	Replicate 2, min-1	Replicate 1, min-1	Replicate 2, min-1
10000					0.47704	0.45288		0.54888		0.5602
5000	0.31922	0.465736	2.30889	2.91569	0.39248	0.40856	0.46818	0.50346	0.4478	0.526	0.54978	0.486758
2000	0.211902	0.312896	1.71052	2.32057	0.29142	0.29612	0.34104	0.4033	0.269	0.38944	0.37954	0.348018
500	0.0697724	0.125896	0.659138	0.922358	0.120374	0.119756	0.110602	0.132422	0.144	0.16704	0.16264	0.169918
200	0.0296423	0.06605	0.29735	0.400894	0.052472	0.056618	0.060666	0.050342	0.076552	0.10761	0.084748	0.101036
50	0.0115772	0.02483	0.0807642	0.105935			0.024228		0.061902		0.02956	0.046436
0	0	0	0	0	0	0	0	0	0	0	0	0
kcat (min-1)	0.50632	0.66004	3.1638	3.8398	0.5577	0.53316	0.688	0.65182	0.59112	0.64108	0.74258	0.59292
Km for ATP (µM)	2888.8	2131.5	1795.2	1469	1883	1630	2243	1538.1	1859	1264	1812.2	1230.4
