# Supplementary material for: Yeast eIF4A enhances recruitment of mRNAs regardless of their structural complexity
Source: eLife. 2017 Nov 30;6:e31476. doi: 10.7554/eLife.31476 (PMC5726853; doi:10.7554/eLife.31476)
Supplement: Figure 2—source data 2. — Control ATPase reactions and individual measurements of ATPase activity with uncapped RPL41A. [file elife-31476-fig2-data2.xlsx]

## Sheet: Sheet1
Figure 2 - figure supplement 1, Source Data 1
Figure 2 - Figure Supplement 1A
Time (min)	+ATP, +eIF4F, PK/LDH: –	+ATP, –eIF4F, PK/LDH: 1x	–ATP, +eIF4F, PK/LDH: 1x	+ATP, +eIF4F, PK/LDH: 0.3x	+ATP, +eIF4F, PK/LDH: 1x	+ATP, +eIF4F, PK/LDH: 3x
0	1.4651	1.4471	1.4226	1.4593	1.4102	1.4087
0.33333	1.4617	1.4455	1.4168	1.4498	1.4051	1.402
0.66667	1.4591	1.4424	1.4173	1.442	1.3983	1.3921
1	1.4616	1.4456	1.414	1.4392	1.3968	1.3903
1.3333	1.4621	1.4457	1.4156	1.4318	1.3902	1.3837
1.6667	1.4613	1.4427	1.4104	1.4223	1.3817	1.3749
2	1.4571	1.4393	1.4102	1.4128	1.3724	1.3654
2.3333	1.4621	1.4424	1.4082	1.4105	1.3704	1.3633
2.6667	1.4598	1.4418	1.4097	1.4029	1.3635	1.3568
3	1.4604	1.44	1.4081	1.3944	1.3559	1.3487
3.3333	1.4572	1.4359	1.4067	1.3843	1.3462	1.3381
3.6667	1.4541	1.4334	1.4055	1.3746	1.3365	1.329
4	1.4561	1.4349	1.407	1.3692	1.3323	1.3242
4.3333	1.4556	1.4345	1.4049	1.3614	1.3252	1.3168
4.6667	1.4512	1.4309	1.4033	1.3505	1.3162	1.3066
5	1.4518	1.4314	1.4011	1.3444	1.3094	1.301
5.3333	1.4549	1.434	1.4031	1.3399	1.3054	1.2962
5.6667	1.4545	1.4331	1.4033	1.3326	1.2972	1.2889
6	1.451	1.4311	1.4014	1.3229	1.2894	1.2808
6.3333	1.4484	1.4294	1.3987	1.3137	1.2792	1.2722
6.6667	1.4502	1.4304	1.3972	1.3081	1.2742	1.2662
7	1.4487	1.4292	1.3989	1.2999	1.266	1.2579
7.3333	1.4477	1.4282	1.3985	1.292	1.2589	1.2496
7.6667	1.4443	1.4255	1.398	1.2821	1.2502	1.241
8	1.4445	1.4247	1.3955	1.2752	1.2434	1.2338
8.3333	1.4467	1.4269	1.3983	1.2694	1.2378	1.2277
8.6667	1.4445	1.425	1.397	1.2599	1.2294	1.2177
9	1.4436	1.4232	1.3978	1.2528	1.2219	1.2095
9.3333	1.4407	1.4215	1.3964	1.2431	1.2137	1.2011
9.6667	1.4437	1.4241	1.3937	1.2376	1.209	1.1961
10	1.443	1.4226	1.3973	1.2294	1.2013	1.1885
10.333	1.4424	1.4219	1.3919	1.2225	1.1939	1.1804
10.667	1.4395	1.4185	1.3923	1.2128	1.1828	1.1716
11	1.4431	1.4219	1.3874	1.2083	1.1815	1.1678
11.333	1.4407	1.421	1.3901	1.2	1.1742	1.1616
11.667	1.4395	1.4182	1.3877	1.191	1.1643	1.1516
12	1.4339	1.4147	1.3853	1.1795	1.1546	1.1422
12.333	1.4402	1.4184	1.3849	1.1765	1.1508	1.1389
12.667	1.4334	1.4129	1.3865	1.1646	1.1395	1.1266
13	1.4319	1.4123	1.3857	1.156	1.132	1.1193
13.333	1.431	1.4118	1.3844	1.1474	1.1238	1.1106
13.667	1.4295	1.4129	1.3821	1.1402	1.1162	1.1038
14	1.4325	1.4149	1.3857	1.1346	1.1108	1.0975
14.333	1.4317	1.4143	1.3861	1.1268	1.1031	1.0901
14.667	1.431	1.413	1.3842	1.1189	1.0943	1.0812
15	1.4287	1.4113	1.3838	1.1092	1.0844	1.0717
15.333	1.4282	1.4108	1.383	1.1007	1.0764	1.0629
15.667	1.4298	1.4126	1.3859	1.0957	1.0695	1.0569
16	1.4289	1.4112	1.3863	1.0862	1.0605	1.0486
16.333	1.4297	1.4107	1.3858	1.0784	1.0533	1.0397
16.667	1.4291	1.4109	1.3839	1.0706	1.0458	1.0322
17	1.431	1.4141	1.3861	1.0659	1.0399	1.0267
17.333	1.4311	1.4133	1.3862	1.0587	1.0335	1.0191
17.667	1.4304	1.4121	1.3851	1.0497	1.0246	1.0111
18	1.4289	1.4111	1.385	1.0402	1.0157	1.0011
18.333	1.4293	1.4124	1.3828	1.0326	1.0091	0.9951
18.667	1.4309	1.4129	1.3855	1.0277	1.0025	0.9885
19	1.4301	1.413	1.3856	1.0187	0.9945	0.9803
19.333	1.4295	1.4111	1.3843	1.0096	0.9857	0.9711
19.667	1.4281	1.4101	1.3845	1.0013	0.9781	0.9637
20	1.431	1.4133	1.3839	0.9963	0.9719	0.9579
20.333	1.4306	1.4129	1.3852	0.9894	0.9641	0.9507
20.667	1.4297	1.4116	1.3856	0.9798	0.9555	0.9416
21	1.4287	1.4106	1.3836	0.9715	0.9467	0.9334
21.333	1.426	1.4086	1.3831	0.9622	0.9386	0.9238
21.667	1.4296	1.4121	1.3865	0.9577	0.9329	0.9185
22	1.4299	1.4126	1.3868	0.9503	0.926	0.911
22.333	1.428	1.4103	1.3864	0.9408	0.9159	0.9011
22.667	1.4266	1.409	1.3868	0.9319	0.9074	0.893
23	1.4293	1.4114	1.3853	0.9271	0.9026	0.8877
23.333	1.429	1.411	1.3888	0.9174	0.8931	0.8793
23.667	1.4283	1.41	1.3862	0.9094	0.8856	0.8704
24	1.4262	1.4079	1.3873	0.9007	0.8759	0.8609
24.333	1.4295	1.4126	1.3844	0.8977	0.8719	0.8574
24.667	1.4299	1.4122	1.3909	0.8893	0.8644	0.8487
25	1.428	1.4097	1.3908	0.8783	0.8538	0.8392
25.333	1.4283	1.4096	1.3891	0.8705	0.8468	0.8313
25.667	1.4261	1.4088	1.3886	0.8625	0.8375	0.8225
26	1.4305	1.4112	1.3901	0.8574	0.8323	0.8173
26.333	1.429	1.4089	1.3916	0.8467	0.8235	0.8082
26.667	1.4303	1.41	1.3909	0.8391	0.8154	0.8
27	1.4287	1.4073	1.389	0.8294	0.8054	0.7898
27.333	1.4315	1.4105	1.3858	0.8259	0.8	0.7853
27.667	1.4286	1.4076	1.3904	0.8136	0.7898	0.7741
28	1.429	1.407	1.3925	0.8059	0.7814	0.7657
28.333	1.4275	1.4053	1.3897	0.7955	0.7722	0.7557
28.667	1.428	1.4048	1.3901	0.7873	0.7639	0.7478
29	1.4327	1.4078	1.3892	0.784	0.7594	0.7425
29.333	1.4328	1.4094	1.3916	0.7766	0.753	0.7362
29.667	1.4306	1.4068	1.3907	0.7659	0.7424	0.7246
30	1.4301	1.4069	1.39	0.7576	0.7341	0.7165
30.333	1.433	1.4083	1.3882	0.7523	0.728	0.7097
30.667	1.4325	1.408	1.3918	0.7436	0.7201	0.7025
31	1.4331	1.4078	1.393	0.7359	0.7122	0.6936
31.333	1.4317	1.4068	1.391	0.7268	0.703	0.6857
31.667	1.4314	1.4062	1.3914	0.7189	0.6951	0.6768
32	1.4344	1.4081	1.391	0.7126	0.689	0.671
32.333	1.4347	1.4078	1.3919	0.7053	0.6812	0.6629
32.667	1.4335	1.4075	1.3908	0.6971	0.6734	0.6549
33	1.4336	1.4071	1.389	0.688	0.6649	0.6468
33.333	1.4356	1.4098	1.389	0.683	0.6586	0.6391
33.667	1.4366	1.4097	1.3914	0.6749	0.6518	0.6312
34	1.4334	1.4062	1.3906	0.6637	0.6404	0.6202
34.333	1.4309	1.4044	1.3894	0.6548	0.6307	0.6105
34.667	1.433	1.4074	1.3898	0.6493	0.6253	0.6049
35	1.4332	1.4065	1.3913	0.6398	0.6167	0.5956
35.333	1.4319	1.4043	1.391	0.6302	0.6074	0.5864
35.667	1.4309	1.4044	1.3901	0.6225	0.5977	0.5773
36.002	1.4331	1.4065	1.3888	0.6168	0.593	0.5719
36.335	1.4338	1.4069	1.3918	0.6088	0.5852	0.5644
36.667	1.4332	1.405	1.3915	0.6001	0.577	0.5548
37	1.4307	1.4037	1.3893	0.592	0.5666	0.5457
37.333	1.4352	1.4082	1.3885	0.5873	0.5622	0.5413
37.668	1.4339	1.4063	1.391	0.5796	0.5542	0.5317
38.002	1.4331	1.4067	1.3902	0.5707	0.5447	0.5232
38.335	1.4316	1.4042	1.3897	0.5593	0.5356	0.5128
38.667	1.43	1.4032	1.3886	0.5501	0.5254	0.5041
39	1.4322	1.4047	1.3916	0.5439	0.5203	0.498
39.333	1.4322	1.4063	1.3905	0.5363	0.5122	0.4907
39.668	1.4309	1.4052	1.3895	0.5285	0.5042	0.4823
Figure 2 - Figure Supplement 1B
	Complete PIC		4A•4G•4E (no PIC)
[no cap RNA], nM	Replicate 1, min-1	Replicate 2, min-1	Replicate 1, min-1	Replicate 2, min-1
1000	6.43089	8.7154	4.09919	3.8804
500	6.82764	8.6846	3.02764	3.4188
250	6.64878	8.4474	2.47967	2.7786
100	5.92846	7.7108	2.0439	2.288
50	5.06992	7.433	1.10309	1.3874
0	4.56098	7.038	0.206016	0.37186
kcat (min-1)	6.88683	9.116	4.2722	4.23526
Km for no cap RNA (nM)	73.95	156	174.25	126
