# Supplementary material for: Yeast eIF4A enhances recruitment of mRNAs regardless of their structural complexity
Source: eLife. 2017 Nov 30;6:e31476. doi: 10.7554/eLife.31476 (PMC5726853; doi:10.7554/eLife.31476)
Supplement: Figure 3—source data 1. [file elife-31476-fig3-data1.xlsx]

## Sheet: Sheet1
Figure 3 - source data 1
Figure 3B
	endpoint +eIF4A (%)			endpoint –eIF4A (%)
mRNA #	Replicate 1	Replicate 2	Replicate 3	Replicate 1	Replicate 2	Replicate 3
1	88.28	84.836	86.994	76.28	73.371	73.307
2	92.99	94.019		56.13	76.056
3	91.966	92.934		68.779	55.32
4	95.18	95.549		66.794	70.602
5	92.135	91.424		75.102	81.453
6	85.111	86.657		73.616	72.032
7	92.74	93.834	91.19	59.746	57.854	49.639
8	88.343	76.823	73.568	13.878	14.296	14.656
9	93.078	79.166	74.803	8.4355	8.314	11.621
10	91.433	93		4.49	5.4093
Figure 3C
	mRNA recruitment, kmax (min-1)
mRNA #	Replicate 1	Replicate 2	Replicate 3
1	7.7042	5.13327	5.73786
2	3.76	2.89
3	5.08343	3.87241
4	6.9577	5.3425
5	2.3738	3.41586
6	2.1958	2.4829
7	2.6	4.15	3.17
8	0.131	0.321	0.145
9	0.132	0.194	0.157
10	1.164	1.4088
Figure 3D
mRNA #	kmax Avg	kmax Av Dev	no eIF4A kobs, Avg	no eIF4A kobs, Av Dev
1	6.19178	1.00828	0.86	0.09
2	3.325	0.435	0.26	0.16
3	4.47792	0.60551	0.2	0.08
4	6.1501	0.8076	0.88	0.07
5	2.89483	0.52103	0.72	0.02
6	2.33935	0.14355	0.79	0.02
7	3.35397	0.611309	0.056	0.011
8	11.2333	6.41778	1.06885	0.440764
9	5.51753	0.394978	0.64789	0.288073
10	41.38	1.33	0.223665	0.068665
NOTE: mRNAs 8-10 estimated from linear fits due to very low endpoints
