# Supplementary material for: Yeast eIF4A enhances recruitment of mRNAs regardless of their structural complexity
Source: eLife. 2017 Nov 30;6:e31476. doi: 10.7554/eLife.31476 (PMC5726853; doi:10.7554/eLife.31476)
Supplement: Figure 3—source data 2. — Observed rates (kobs) of mRNA recruitment for mRNAs 1–10 at varying concentrations of eIF4A. [file elife-31476-fig3-data2.xlsx]

## Sheet: Sheet1
Figure 3 - figure supplement 1, source data 1
Figure 3 - Figure Supplement 1B-E
	mRNA 1 (CAA 50-mer)			mRNA 2		mRNA 3		mRNA 4		mRNA 5		mRNA 6
[eIF4A] (µM)	Replicate 1	Replicate 2	Replicate 3	Replicate 1	Replicate 2	Replicate 1	Replicate 2	Replicate 1	Replicate 2	Replicate 1	Replicate 2	Replicate 1	Replicate 2
5	7.021	4.4311	5.3759	3.232	2.8439	4.2075	3.3575	6.3823	4.6565	2.1359	2.9517	1.8081	1.8581
2	5.4187	3.9423	4.6752	2.8596	1.7635	2.9517	2.8924	5.0854	4.2794	2.4231	3.5196	2.1633	2.6463
0.5	3.7779	2.3634	3.642	1.4244	1.2256	1.7502	1.7045	3.6253	2.5835	1.9294	2.8759	2.6208	2.8577
0.1	2.0223	0.98089	1.4192	0.5712	0.82427	0.60613	0.46872	1.6065	1.1706	1.218	1.4647	1.5876	1.4119
0	0.95043	0.76985	0.97249	0.10724	0.41908	0.12074	0.28107	0.94439	0.80937	0.70581	0.74146	0.80595	0.77347
kmax, min-1	7.7042	5.13327	5.73786	3.76	2.89	5.08343	3.87241	6.9577	5.3425	2.3738	3.41586	2.1958	2.4829
K1/2 for 4A	0.80952	0.81692	0.45668	0.724	0.665	1.2774	0.75672	0.707	0.72	0.188	0.177	0.04471	0.0793
	mRNA 7			mRNA 8			mRNA 9			mRNA 10 (natural RPL41A)
[eIF4A] (µM)	Replicate 1	Replicate 2	Replicate 3	Replicate 1	Replicate 2	Replicate 3	Replicate 1	Replicate 2	Replicate 3	Replicate 1	Replicate 2
10	2.569	3.293	2.65	0.125	0.2981	0.1252	0.09953	0.1323	0.12192	0.9391	0.9431
5	2.052	2.664	2.3864	0.1048	0.1946	0.121	0.08575	0.09767	0.10109	0.7318	0.7387
2	2.003	1.944	2.44	0.07577	0.2436	0.1078	0.05587	0.05246	0.064791	0.5231	0.4615
1	1.5	0.8714	0.7322	0.06339	0.08628	0.0653	0.02748	0.03354	0.038322	0.3436	0.1885
0.25	0.675	0.645	0.4438	0.0379	0.04945	0.01795	0.01035	0.02879	0.01722	0.05866	0.03404
0	0.06756	0.04507	0.08643	ND	ND	ND	ND	ND	ND	ND	ND
kmax, min-1	2.6	4.15	3.17	0.131	0.321	0.145	0.132	0.194	0.157	1.164	1.4088
K1/2 for 4A	0.72	2.64	1.5	1.006	1.55	1.075	3	4.8	2.85	2.6	4.735
