# Supplementary material for: Yeast eIF4A enhances recruitment of mRNAs regardless of their structural complexity
Source: eLife. 2017 Nov 30;6:e31476. doi: 10.7554/eLife.31476 (PMC5726853; doi:10.7554/eLife.31476)
Supplement: Figure 4—source data 1. [file elife-31476-fig4-data1.xlsx]

## Sheet: Sheet1
Figure 4 - source data 1
Figure 4
mRNA #	kmax (min-1), Average	kmax, Avg Dev	no eIF4A kobs (min-1), Avg	no eIF4A kobs, Avg Dev
1	5.2043	1.0423	3.2264	0.2999
4	9.7103	0.7295	2.23145	0.67205
7	3.9372	1.01924	0.854185	0.072395
