# Supplementary material for: Yeast eIF4A enhances recruitment of mRNAs regardless of their structural complexity
Source: eLife. 2017 Nov 30;6:e31476. doi: 10.7554/eLife.31476 (PMC5726853; doi:10.7554/eLife.31476)
Supplement: Figure 4—source data 2. — Individual measurements of the observed rate of mRNA recruitment (kobs) with uncapped mRNAs at various concentrations of eIF4A. [file elife-31476-fig4-data2.xlsx]

## Sheet: Sheet1
Figure 4 - figure supplement 1, source data 1
Figure 4 - Figure Supplement 1A
For +cap data, please see Fig 3 - Supplement 1
	no cap mRNA 1 (CAA 50-mer)
[eIF4A] (µM)	Replicate 1	Replicate 2
5	5.0917	3.5153
2	4.614	4.4601
0.5	3.2385	4.6169
0.1	3.2708	3.6975
0	2.9265	3.5263
kmax, min-1	6.2466	4.162
Figure 4 - Figure Supplement 1B
For +cap data, please see Fig 3 - Supplement 1
	no cap mRNA 4
[eIF4A], µM	Replicate 1	Replicate 2
10	7.8241	10.396
5	8.0894	9.1534
2	11.627	7.2341
1	4.3779	8.6712
0.25	5.7227	3.3465
0	2.9035	1.5594
kmax, min-1	8.9808	10.4398
Figure 4 - Figure Supplement 1C
For +cap data, please see Fig 3 - Supplement 1
	no cap mRNA 7
[eIF4A], µM	Replicate 1	Replicate 2
10	3.5465	2.4708
5	3.0774	1.9392
2	1.9685	1.6086
0.5	1.3586	1.1331
0.1	1.1686	0.56849
0	0.92658	0.78179
kmax	4.95644	2.91795
