# Supplementary material for: Yeast eIF4A enhances recruitment of mRNAs regardless of their structural complexity
Source: eLife journal article supplement (doi:10.7554/elife.31476), 2017-11-29
Supplement: supp [file elife-31476-supp-v1.zip]

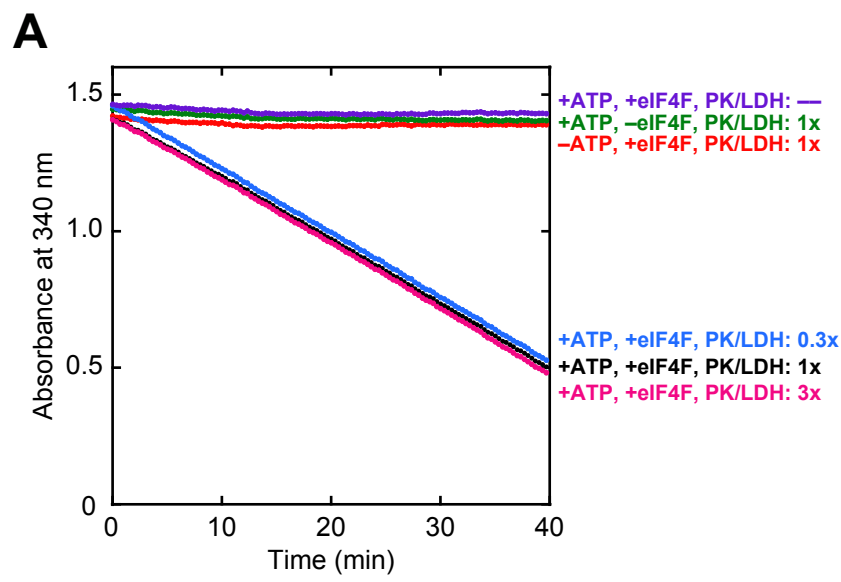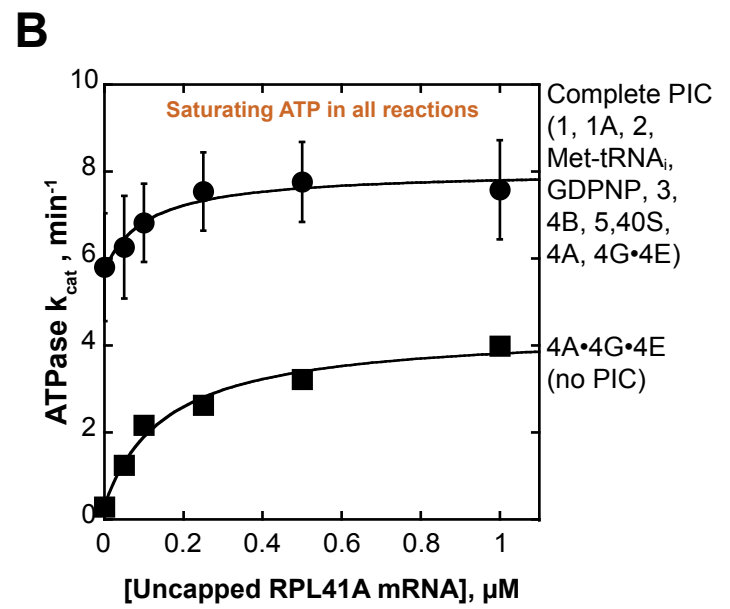

**C**

All values in the table were measured with saturating RPL41A mRNA

|                                      | ATPase $k_{cat}$ , $\text{min}^{-1}$ | $K_m^{\text{ATP}}$ , $\mu\text{M}$ |
|--------------------------------------|--------------------------------------|------------------------------------|
| 4A•4G•4E                             | $2.4 \pm 0.1$                        | $250 \pm 10$                       |
| TC, 40S, 4A•4G•4E                    | $2.7 \pm 0.2$                        | $280 \pm 40$                       |
| 3, 4A•4G•4E                          | $3.2 \pm 0.7$                        | $200 \pm 40$                       |
| <b>Complete PIC</b>                  | <b><math>8.2 \pm 0.3</math></b>      | <b><math>330 \pm 20</math></b>     |
| Components missing from Complete PIC | -4A                                  | $\sim 0.10 \pm 0.01$ ND            |
|                                      | -40S                                 | $4.5 \pm 0.1$ $150 \pm 1$          |
|                                      | -2                                   | $4.7 \pm 0.1$ $210 \pm 5$          |
|                                      | -3                                   | $3.3 \pm 0.2$ $180 \pm 20$         |
|                                      | -3g, -3i                             | $3.9 \pm 0.3$ $170 \pm 10$         |
|                                      | -2, -40S                             | $4.1 \pm 0.1$ $150 \pm 1$          |
|                                      | -3, -40S                             | $3.0 \pm 0.1$ $150 \pm 1$          |
|                                      | -4B                                  | $8.0 \pm 0.1$ $480 \pm 10$         |
|                                      | -5                                   | $8.0 \pm 0.4$ $350 \pm 10$         |

**D**

All values in the table were measured with saturating RPL41A mRNA

|                                      | ATPase $k_{cat}$ , $\text{min}^{-1}$ | $K_m^{\text{ATP}}$ , $\mu\text{M}$ |
|--------------------------------------|--------------------------------------|------------------------------------|
| 4A                                   | $0.58 \pm 0.08$                      | $2500 \pm 400$                     |
| <b>Complete PIC -eIF4G•4E</b>        | <b><math>3.5 \pm 0.3</math></b>      | <b><math>1600 \pm 200</math></b>   |
| Components missing from Complete PIC | -40S, -4G•4E                         | $0.55 \pm 0.01$ $1800 \pm 100$     |
|                                      | -2, -4G•4E                           | $0.67 \pm 0.02$ $1900 \pm 400$     |
|                                      | -3, -4G•4E                           | $0.62 \pm 0.02$ $1600 \pm 300$     |
|                                      | -3g, -3i, -4G•4E                     | $0.67 \pm 0.07$ $1500 \pm 300$     |

Figure 2 – figure supplement 1.

**Figure 2 – Figure supplement 1.** Control and data tables for the ATPase experiments. **(A)**

Controls for NADH enzyme-coupled microplate ATPase assay. The decrease in absorbance of 340 nm light was dependent on the presence of ATPase activity (5  $\mu\text{M}$  eIF4A, 0.5  $\mu\text{M}$  eIF4G•4E, together referred to as eIF4A•4G•4E or eIF4F),  $\text{ATP}\cdot\text{Mg}^{2+}$ , and a pyruvate kinase (900-1400 units/mL)/lactate dehydrogenase (600-1000 units/mL) mixture from rabbit muscle used as a 250x stock solution. **(B)** ATPase activity as a function of uncapped *RPL41A* mRNA. Solid, black squares: eIF4A•4G•4E (no PIC), as in Figure 2B ( $k_{\text{cat}}$  of  $4.3 \pm 0.1 \text{ min}^{-1}$  and  $K_m^{\text{RNA}}$  of  $150 \pm 20 \mu\text{M}$ ). Solid black circles: "Complete PIC," as in Figure 2B ( $k_{\text{cat}}$  of  $8 \pm 1 \text{ min}^{-1}$  and  $K_m^{\text{RNA}}$  of  $120 \pm 40 \mu\text{M}$ ). **(C-D)** Summary of all  $k_{\text{cat}}$  and  $K_m^{\text{ATP}}$  values in the presence of eIF4G•4E (panel C, red) and absence of eIF4G•4E (panel D, blue). Data in B-D are mean values ( $n \geq 2$ ) and error is reported as average deviation of the mean.
