# Supplementary material for: Yeast eIF4A enhances recruitment of mRNAs regardless of their structural complexity
Source: eLife journal article supplement (doi:10.7554/elife.31476), 2017-11-29
Supplement: supp [file elife-31476-supp-v1.zip]

**A**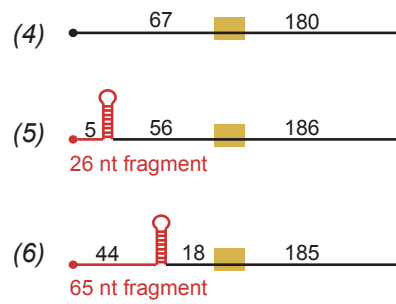**B**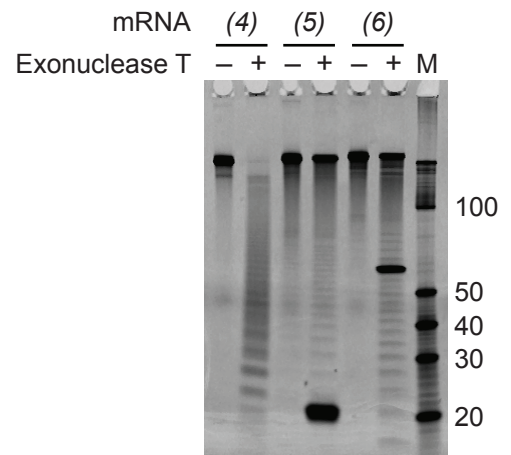

Figure 3 – figure supplement 2.

**Figure 3 – Figure supplement 2.** Evidence that the designed hairpins in the 5'-UTRs of mRNAs 4 and 5 are formed and that mRNA 4 lacks secondary structure. **(A)** RNAs 4-6 used in the study (same as in Figure 3A; shown again here for convenience). The fragments expected to be protected from 3'-5' RNase Exonuclease T digest are indicated in red. **(B)** RNAs 4-6 were incubated in the presence (+) or absence (–) of the 3'-5' RNase Exonuclease T, at the same temperature (26°C) used in all experiments in this study, for 18 hr. Reactions were resolved on a 15% Tris Borate EDTA Urea gel (4 pmol of total RNA per lane) and stained with SYBR Gold nucleic acid gel stain. “M:” Abnova Small RNA Marker. Marker RNA fragment sizes are indicated to the right of the gel.
