# Supplementary material for: Yeast eIF4A enhances recruitment of mRNAs regardless of their structural complexity
Source: eLife journal article supplement (doi:10.7554/elife.31476), 2017-11-29
Supplement: supp [file elife-31476-supp-v1.zip]

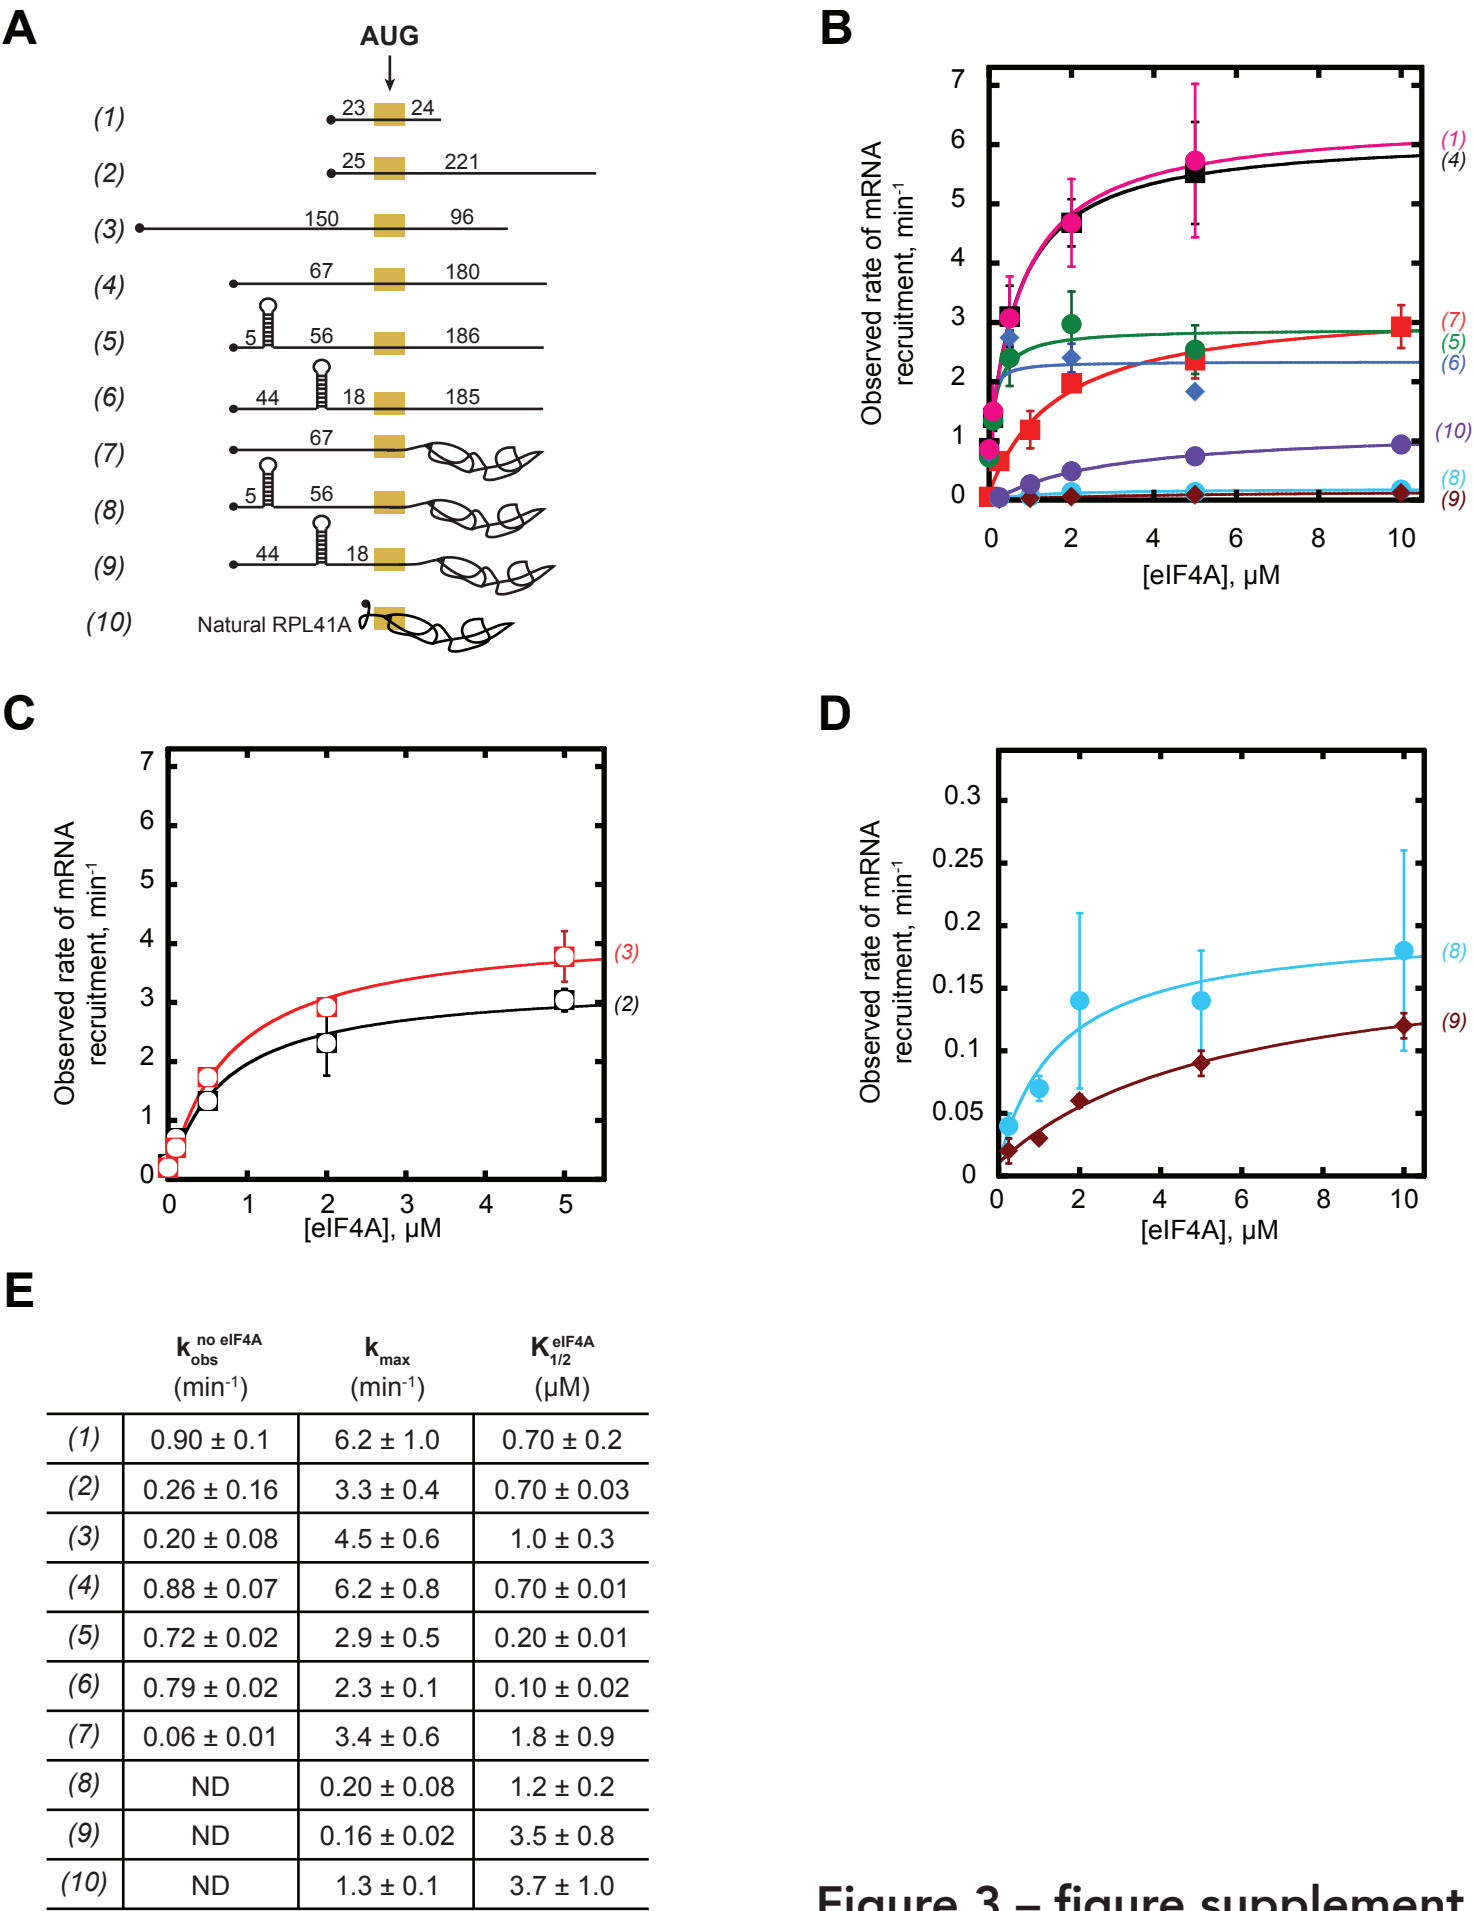

Figure 3 – figure supplement 1.

**Figure 3 – Figure supplement 1.** eIF4A promotes recruitment of both structured and CAA-repeats mRNAs. **(A)** RNAs used in the study (same as (A) in Figure 3, shown again here for convenience). **(B-C)** Observed rates ( $k_{obs}$ )  $\text{min}^{-1}$  of mRNA recruitment as a function of the concentration of eIF4A. Data were fit with a hyperbolic equation allowing for a y-intercept  $> 0$  (see Methods). Numbers in parentheses, to the right of the coordinate plane, correspond to mRNAs in (A) and are colored for easier visualization of distinct curves. RNAs 2 and 3 are shown separately for clarity. **(D)** Expansion of plots for mRNAs 8 and 9 from (B) for clarity. **(E)** The observed rate of recruitment in the absence of eIF4A ( $k_{obs}^{no\ eIF4A}$ ), the maximal rate of recruitment with saturating eIF4A ( $k_{max}$ ), and the concentration of eIF4A required to achieve the half-maximal rate of recruitment ( $K_{1/2}^{eIF4A}$ ) from fits in panels B-D. “ND.” the observed rate from an exponential fit could not be determined because of low reaction endpoint. All data presented in the figure are mean values ( $n \geq 2$ ) and error values are average deviation of the mean.
