# Supplementary material for: Yeast eIF4A enhances recruitment of mRNAs regardless of their structural complexity
Source: eLife journal article supplement (doi:10.7554/elife.31476), 2017-11-29
Supplement: supp [file elife-31476-supp-v1.zip]

**A**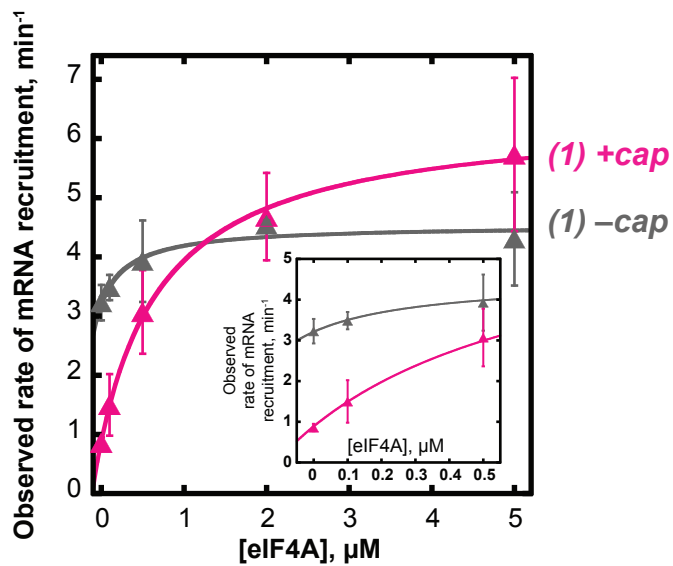**B**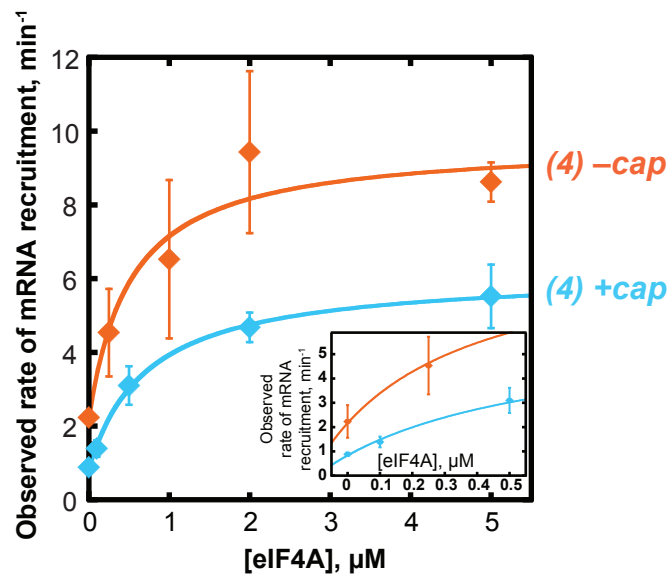**C**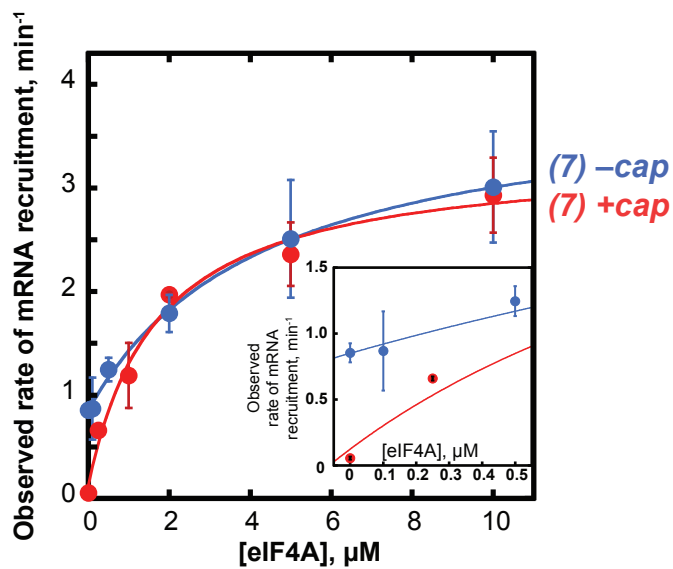

Figure 4 – figure supplement 1.

**Figure 4 – Figure supplement 1.** The 5'-7-methylguanosine cap inhibits mRNA recruitment in the absence of eIF4A. mRNA recruitment of **(A)** RNA 1 (CAA 50-mer), **(B)** RNA 4, and **(C)** RNA 7 in the presence or absence of a 5'-cap, as indicated to the right of each curve. Numbers to the right of the plots correspond to RNAs in Figure 3A. Insets show the observed rates versus eIF4A concentration up to 0.5  $\mu$ M to focus on the 0  $\mu$ M eIF4A points. All data presented in the figure are mean values ( $n \geq 2$ ) and error bars represent average deviation of the mean.
