# Supplementary material for: Yeast eIF4A enhances recruitment of mRNAs regardless of their structural complexity
Source: eLife journal article supplement (doi:10.7554/elife.31476), 2017-11-29
Supplement: supp [file elife-31476-supp-v1.zip]

**Figure 1 – Figure supplement 1.** RPL41A can form structural elements throughout its length whereas the CAA 50-mer has a low propensity to form structures. RNA folds, predicted by mfold (Zuker, 2003), that are representative of the population of conformations adopted by (A-B) CAA 50-mer,  $\Delta G > -1$  kcal/mol; (C) *RPL41A*,  $\Delta G = -46$  kcal/mol; (D) chimeric RNA with CAA repeat 5'-UTR and RPL41A sequence 3' of the AUG codon (RNA 7; Figure 3A),  $\Delta G = -51$  kcal/mol.
